# Supplementary material for: Dioxo-vanadium(v), oxo-rhenium(v) and dioxo-uranium(vi) complexes with a tridentate Schiff base ligand
Source: Royal Society of Chemistry journal article supplement (doi:10.1039/c6ra12872f), 2016-01-01
Supplement: c6ra12872f1.pdf [file c6ra12872f1.pdf]

*Supporting Information File*

**Dioxo-vanadium(V), oxo-rhenium(V) and dioxo-uranium(VI) complexes with a tridentate Schiff base ligand**

Yingjie Zhang,<sup>\*a</sup> Daniel J. Fanna,<sup>b</sup> Nicholas D. Shepherd,<sup>a</sup> Inna Karatchevtseva,<sup>a</sup> Kim Lu,<sup>a</sup> Linggen Kong,<sup>a</sup> and Jason R. Price<sup>c</sup>

<sup>a</sup> Australian Nuclear Science and Technology Organisation, Locked Bag 2001, Kirrawee DC, NSW 2232, Australia

<sup>b</sup> School of Science and Health, Western Sydney University, Locked Bag 1797, Penrith, NSW 2751, Australia

<sup>c</sup> Australian Synchrotron, 800 Blackburn Road, Clayton, VIC 3168, Australia.

Email: [yzx@ansto.gov.au](mailto:yzx@ansto.gov.au) (Y. Zhang)

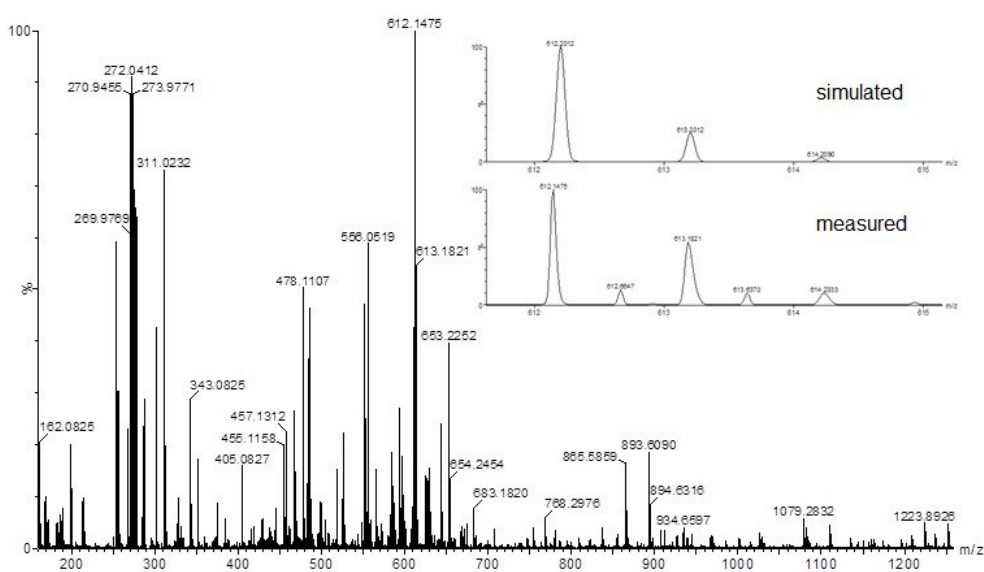

**Figure S1.** ESI-MS for complex **4** with an inset of isotope models of  $612.1475 = \{[C_{22}H_{20}N_3O_3U]\}^{1+}$ .

A

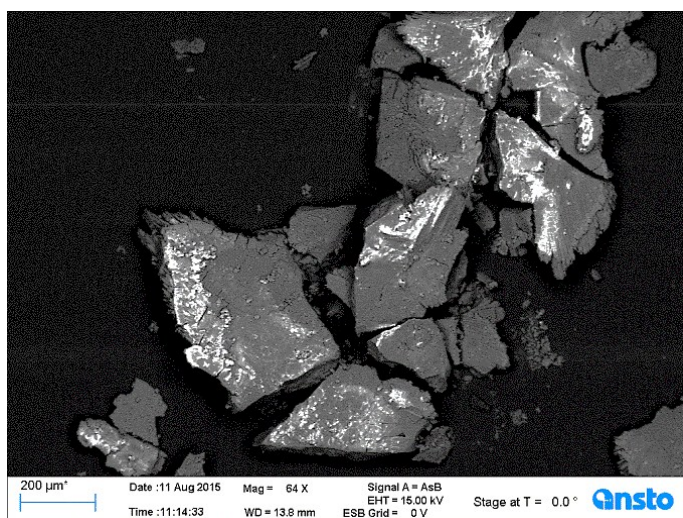

B

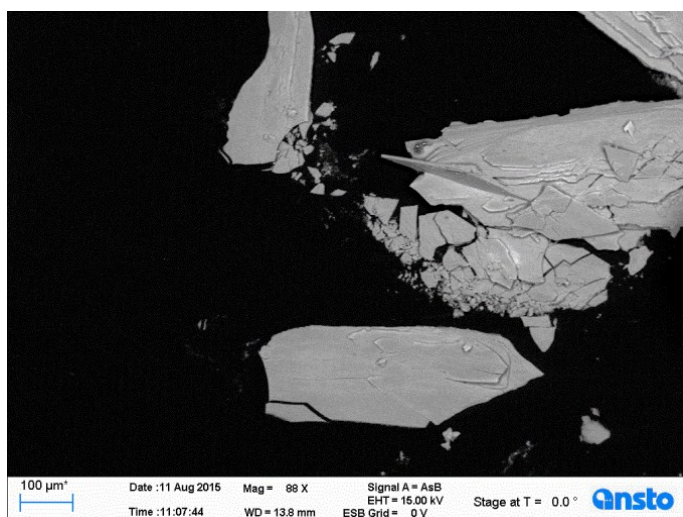

C

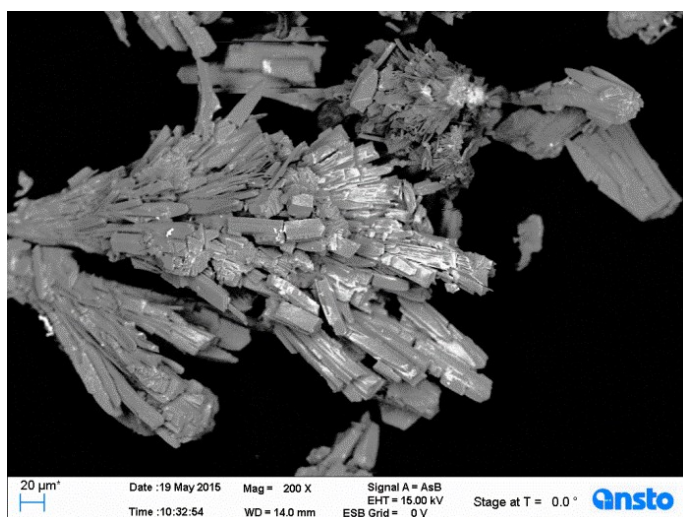

Figure S2. Backscattered SEM images of 1 (A), 2 (B) and 4 (C).

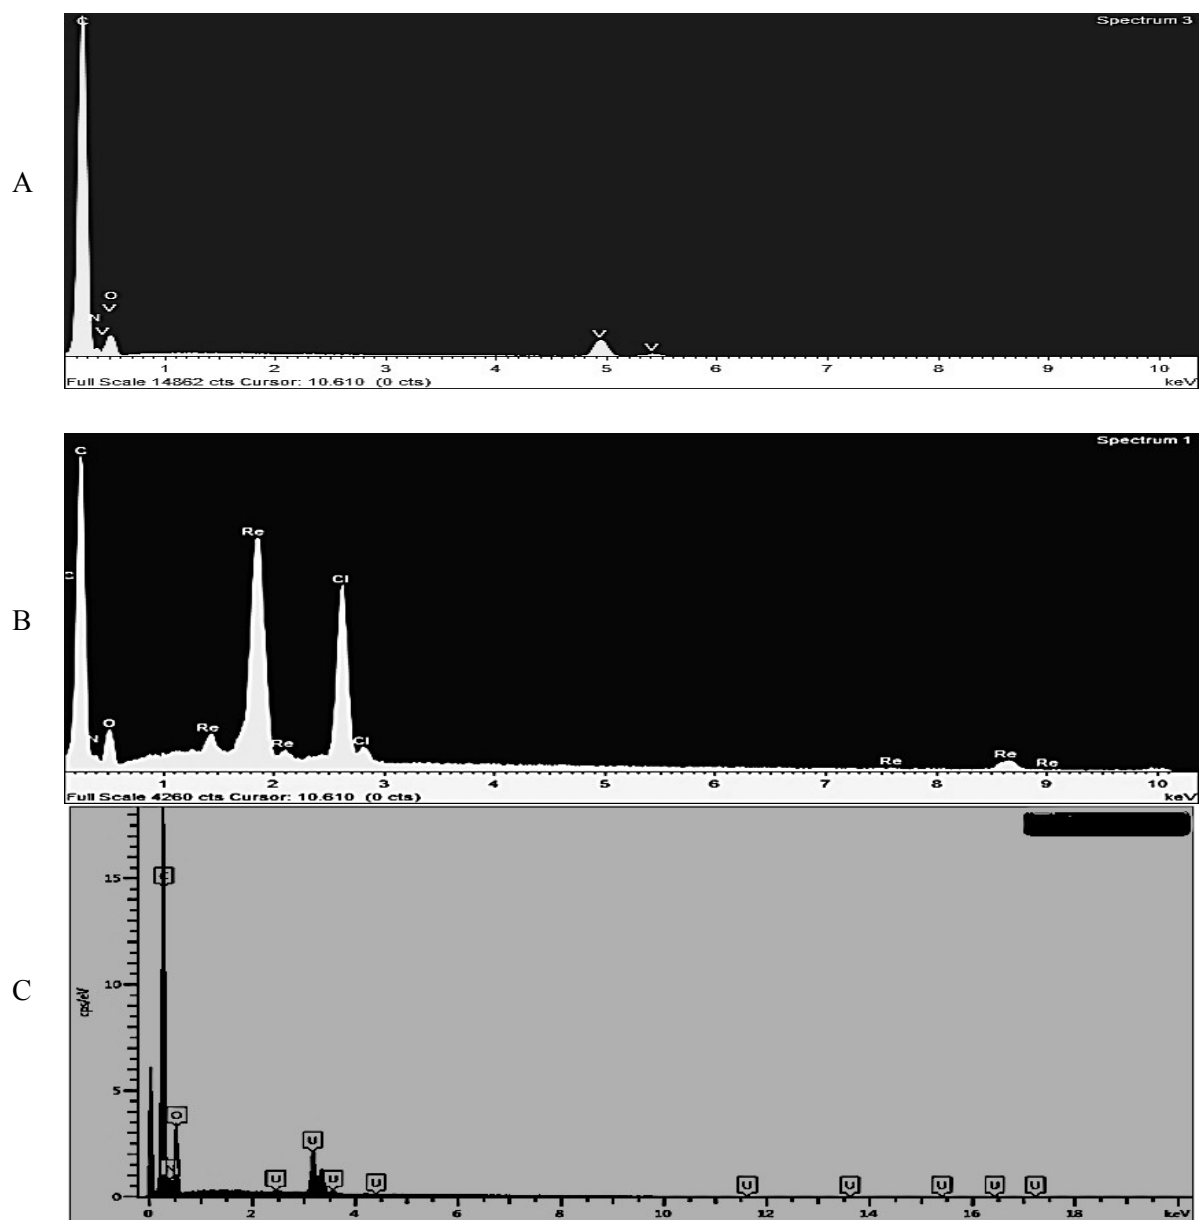

**Figure S3.** SEM-EDS spectra of **1** (A), **2** (B) and **4** (C) showing the presence of key elements.

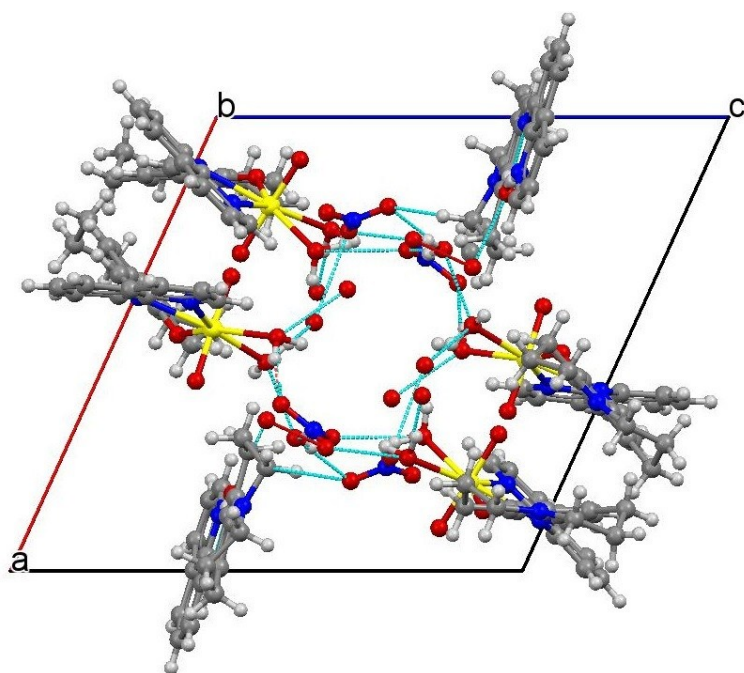

**Figure S4.** Hydrogen bonds among nitrate anions and water molecules in **3** linking the monomeric structure into 1D polymers along the crystallographic *b*-axis.

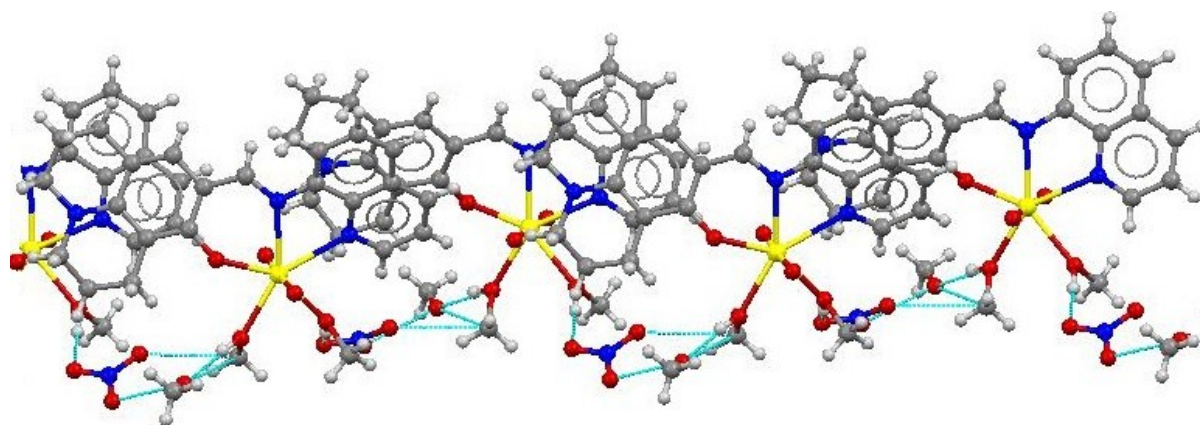

**Figure S5.** Hydrogen bonds among nitrate anions and coordinated methanol molecules in **4** linking the monomeric structures into 1D polymers.
